# Supplementary material for: Hot electron-driven photocatalytic water splitting
Source: Royal Society of Chemistry journal article supplement (doi:10.1039/c6cp07542h), 2017-01-01
Supplement: c6cp07542h1.pdf [file c6cp07542h1.pdf]

### Supplemental Information for

### Hot Electron-Driven Photocatalytic Water Splitting

Bingya Hou,<sup>[a]</sup> Lang Shen,<sup>[b]</sup> Haotian Shi,<sup>[c]</sup> Rehan Kapadia,<sup>[a]</sup> and Stephen B. Cronin<sup>[a, c]</sup>

*Departments of <sup>[a]</sup>Electrical Engineering, <sup>[b]</sup>Material Science, and <sup>[c]</sup>Chemistry,  
University of Southern California, Los Angeles, California 90089, United States*

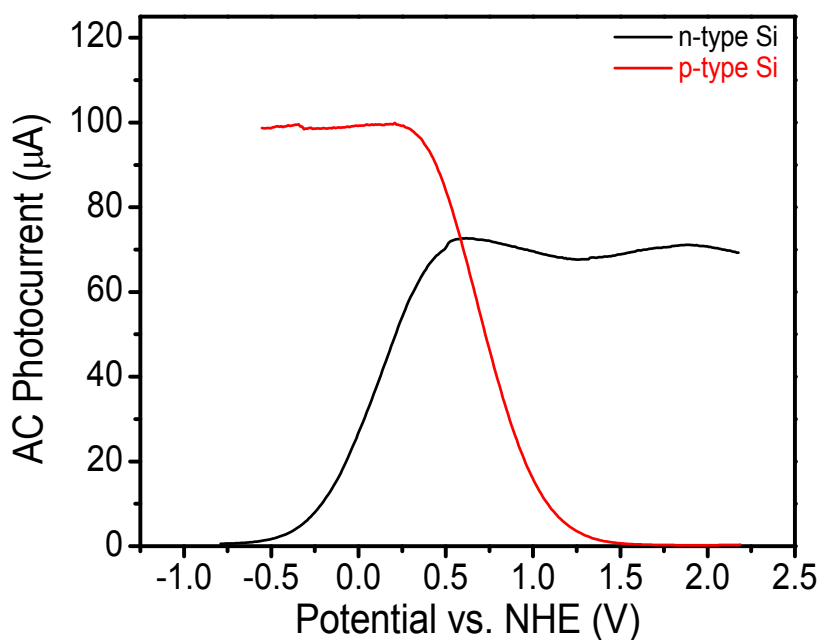

**Figure S1.** AC photocurrent plotted as a function of the reference potential for n- and p-type bulk Si photocatalysts in a 0.5M  $\text{H}_2\text{SO}_4$  solution.

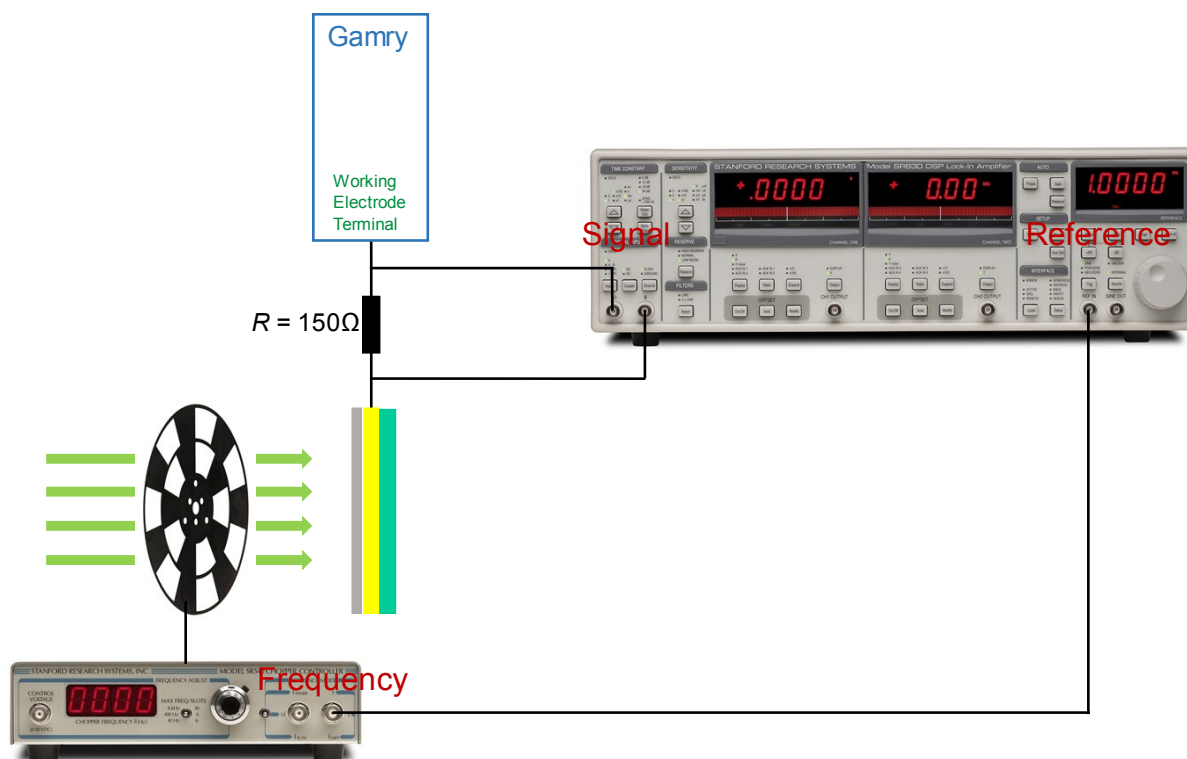

**Figure S2.** Schematic circuit diagram of the AC lock-in technique, in which the incident light is modulated by a chopper wheel and chopper controller, which provides a reference signal for the lock-in amplifier. This enables the lock-in amplifier to detect only voltages at the specific frequency of the modulated light, providing a very sensitive measure of the photoresponse of these photocatalytic surfaces. Here, the “signal” measured by the lock-in amplifier is the voltage drop across a known resistor ( $150\Omega$ ). This voltage drop is converted to photocurrent by dividing the measured AC voltage by the known resistance (i.e.,  $I=V/R$ ).

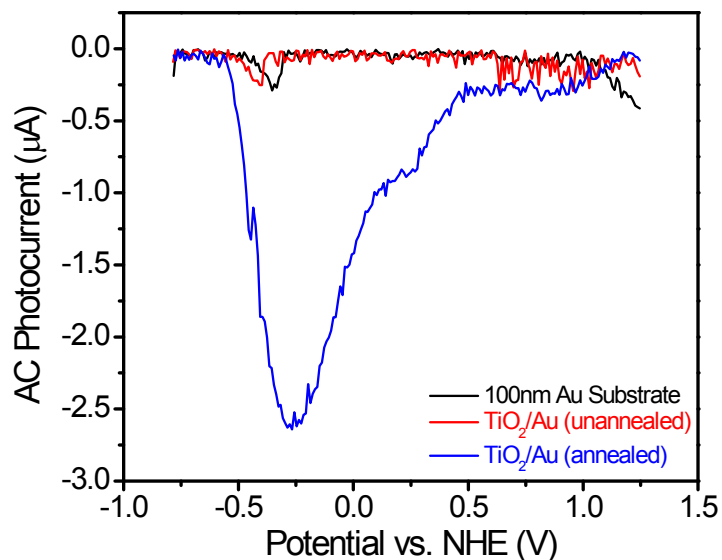

**Figure S3.** Additional datasets of the AC photocurrent plotted as a function of the reference potential for the hydrogen evolution reaction (HER), which show the same behavior observed in Figure 3 of the manuscript.

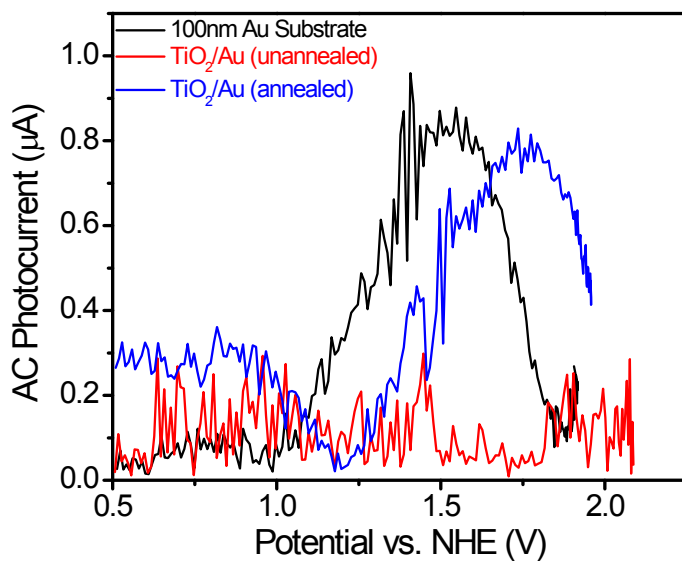

**Figure S4.** Additional datasets of the AC photocurrent plotted as a function of the reference potential for the oxygen evolution reaction (OER), which show the same behavior observed in Figure 4 of the manuscript.

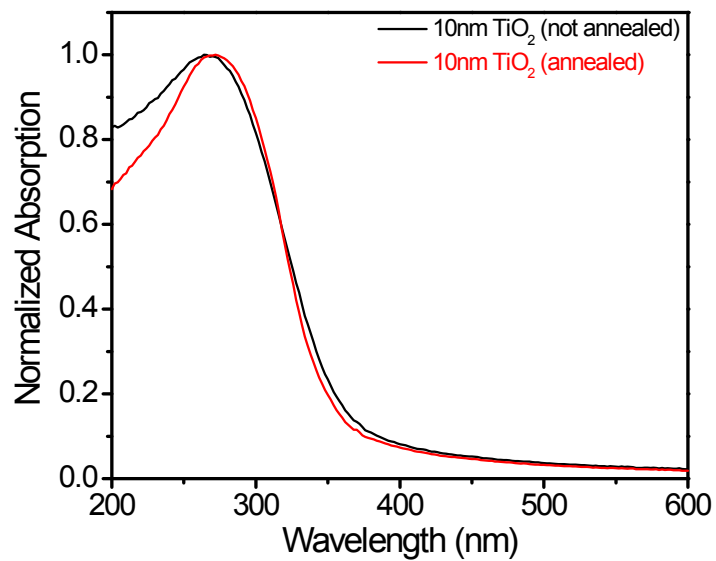

**Figure S5.** UV-vis absorption spectra of a 10nm thick TiO<sub>2</sub> film taken before and after annealing at 450°C for 30 min in an O<sub>2</sub> gas environment.
